# Supplementary material for: Solvothermal Guided V2O5 Microspherical Nanoparticles Constructing High-Performance Aqueous Zinc-Ion Batteries
Source: MDPI journal article supplement (doi:10.3390/ma17071660), 2024-04-04
Supplement: s1 [file s1]

# Solvothermal guided V<sub>2</sub>O<sub>5</sub> microspherical nanoparticles constructing high performance aqueous zinc-ion batteries

Xianghui Jia<sup>†</sup>, Kaixi Yan<sup>†</sup>, Yanzhi Sun<sup>†,\*</sup>, Yongmei Chen<sup>†</sup>, Yang Tang<sup>†</sup>, Junqing Pan<sup>‡,\*</sup> and Pingyu Wan<sup>†</sup>

<sup>†</sup>National Fundamental Research Laboratory of New Hazardous Chemicals Assessment and Accident Analysis, Institute of Applied Electrochemistry, Beijing University of Chemical Technology, Beijing 100029, China.

<sup>‡</sup>State Key Laboratory of Chemical Resource Engineering, Beijing University of Chemical Technology, Beijing 100029, China.

\*E-mails: sunyz@buct.edu.cn (Y. Sun); jqpan@buct.edu.cn (J. Pan). Tel./Fax: 8610-64435452.

## Experimental Section

### Materials characterization

The crystal structure of the V<sub>2</sub>O<sub>5</sub> samples were analyzed by X-ray diffraction (XRD) and the morphology and elemental content of V<sub>2</sub>O<sub>5</sub> was investigated by transmission electron microscopy (TEM), scanning electron microscopy (SEM) and X-ray energy spectrometry (EDS). X-ray photoelectron spectroscopy (XPS) was carried out with Thermo Scientific K-Alpha to characterize the surface chemistry of the electrode materials and the valence state of vanadium. Fourier transform infrared spectroscopy (FT-IR) was used to test the chemical bonding and molecular structure of the VOCH precursors and V<sub>2</sub>O<sub>5</sub> samples. The composition and decomposition temperature of the ethanol or glycol complexes in the VOCH precursor were studied by thermogravimetric analysis (TGA/DSC) in an air atmosphere in the temperature range 0~500 °C at a heating rate of 10 °C min<sup>-1</sup>. The specific surface area was determined using a fully automated specific surface area and porosity analyzer according to the Brunner-Emmett-Taylor (BET) method.

### Electrochemical measurement

Charge-discharge cycles of the cells were tested at room temperature using a LAND-CT3002A multi-channel battery test system. Cyclic voltammetry (CV) and electrochemical impedance spectroscopy (EIS) tests were carried out on Zn||V<sub>2</sub>O<sub>5</sub> cells using an electrochemical workstation (CHI 660E) with scanning voltage from 0.4 to 1.4 V and AC impedance test at open circuit voltage.

The diffusion coefficient of Zn<sup>2+</sup> ( $D_{Zn}$ ) was calculated according to the following equation:

$$D_{Zn} = \frac{4L^2}{\pi\tau} \left( \frac{\Delta E_s}{\Delta E_t} \right)^2 \quad (S1)$$

In Equation (S1),  $\tau$  is the pulse duration of the constant current,  $L$  is the Zn<sup>2+</sup> diffusion path,  $\Delta E_s$  is the voltage change of the termination voltage of two adjacent relaxation steps and  $\Delta E_t$  is the voltage difference during the current pulse, subtracting the IR drop.

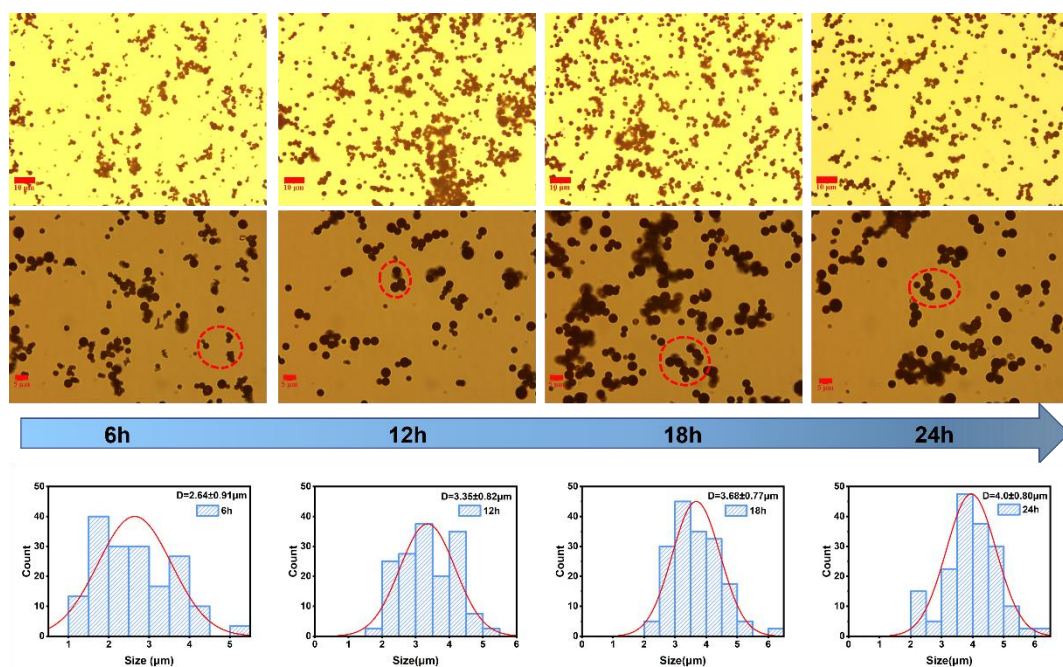

**Figure S1.** Size of the  $V_2O_5$ -20 microspheres at different reaction times (from 6 h to 24 h).

It can be seen for Figure S1 that the microspheres became larger and more uniform in size as the reaction time increased. The average diameter of the synthesized microspheres was  $4 \mu m$  at the maximum reaction time of 24 h.

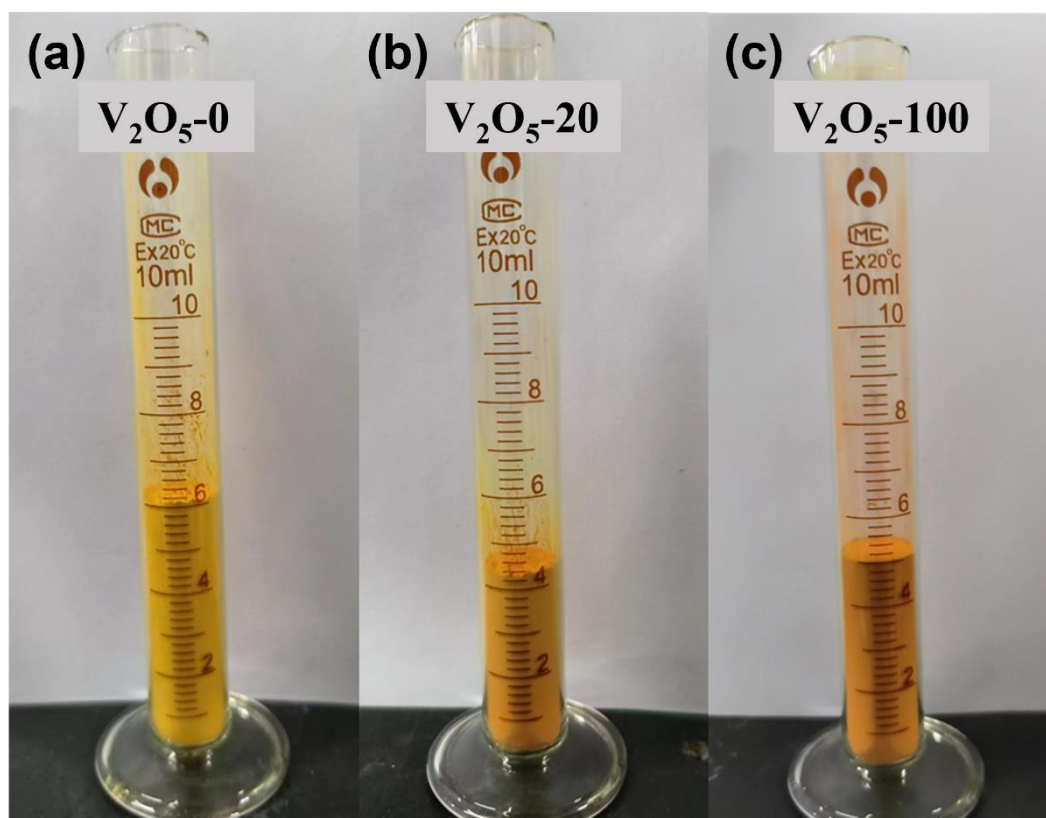

**Figure S2.** Volume comparison of (a)  $V_2O_5$ -0, (b)  $V_2O_5$ -20, and (c)  $V_2O_5$ -100 with the same mass (5 g).

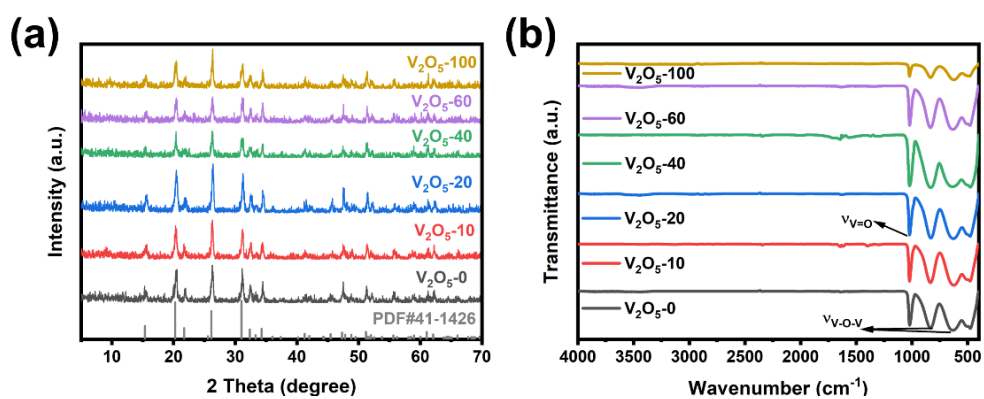

Figure S3. XRD patterns (a) and FT-IR spectra (b) of  $V_2O_5$  samples.

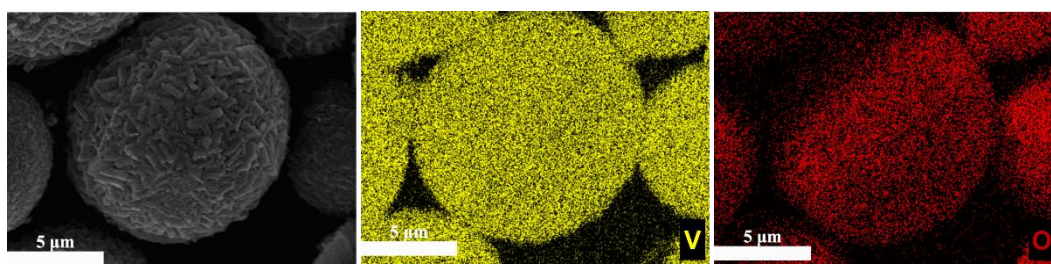

Figure S4. Elemental distribution of  $V_2O_5$ -20.

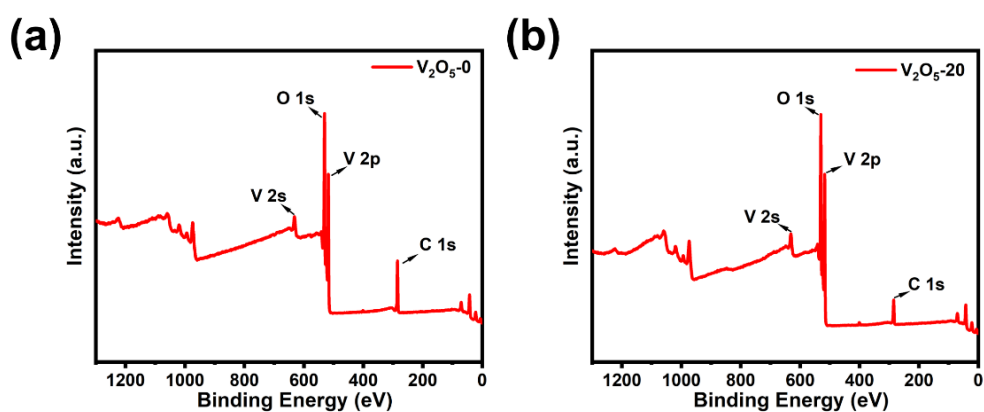

Figure S5. XPS survey spectra of (a)  $V_2O_5$ -0, (b)  $V_2O_5$ -20.

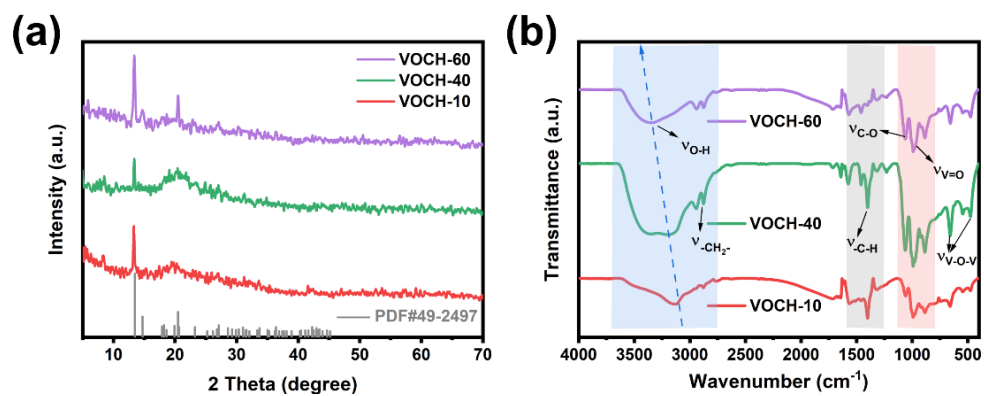

Figure S6. XRD patterns (a) and FT-IR spectra (b) of VOCH precursors.

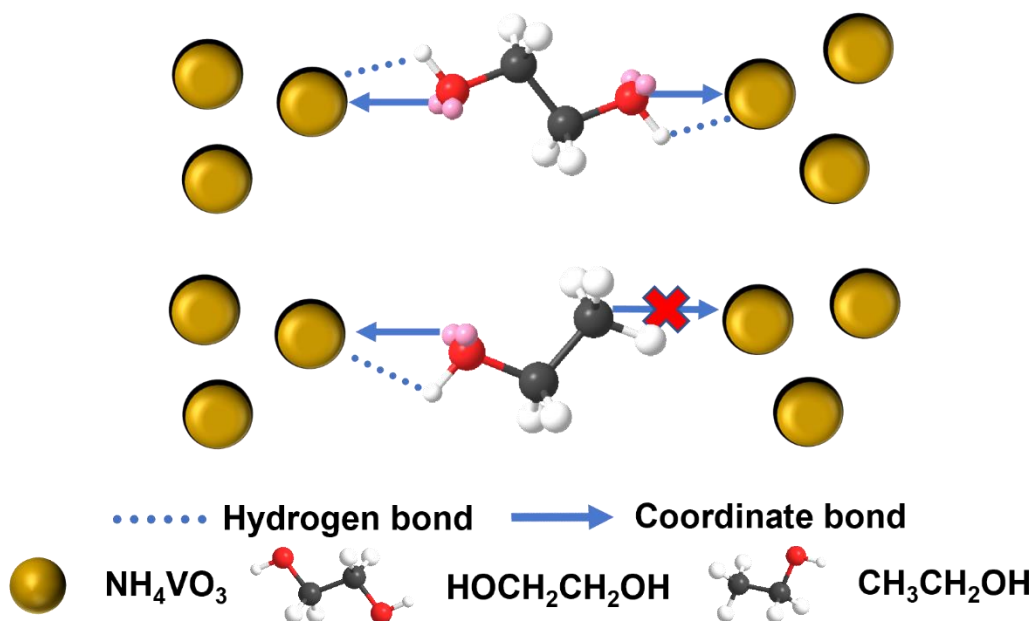

Figure S7. Schematic illustration of the chaining of ethylene glycol or ethanol with nanoparticles.

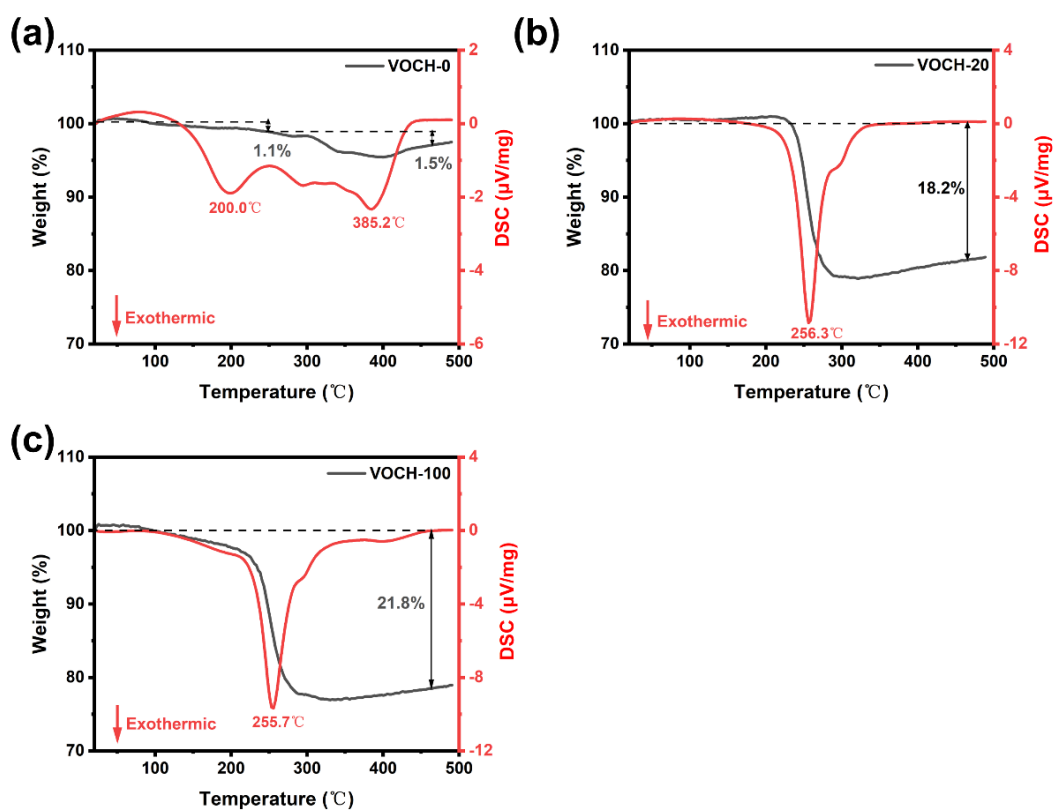

Figure S8. TGA/DSC profiles of (a) VOCH-0, (b) VOCH-20 and (c) VOCH-100 before calcination.

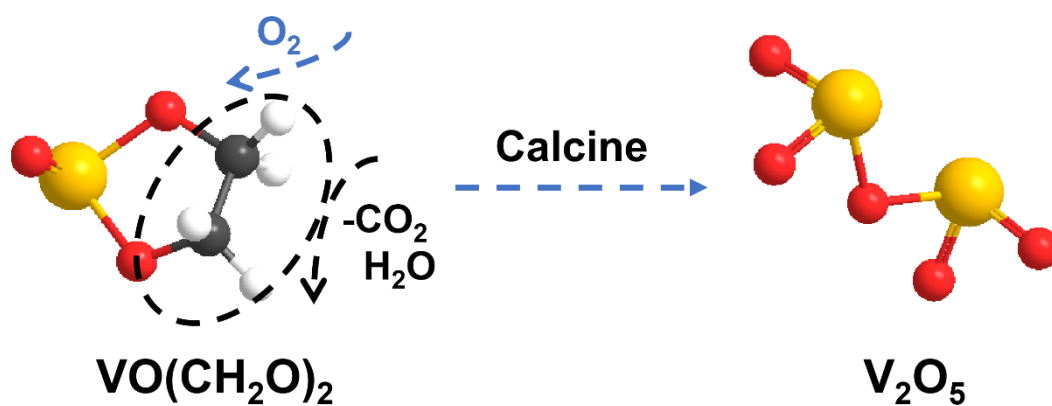

Figure S9. Schematic of  $\text{V}_2\text{O}_5$  formation by calcination of VOCH precursors.

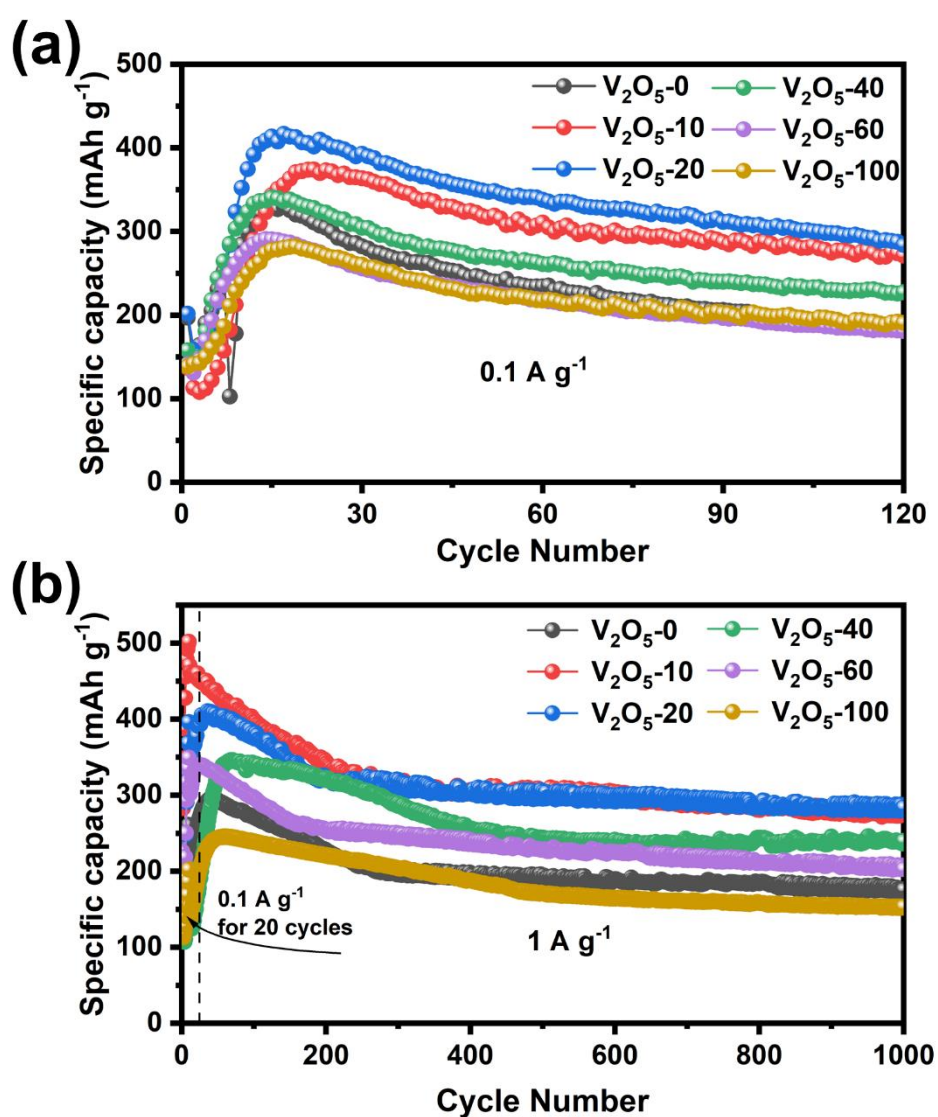

Figure S10. Cycle performance of different  $\text{V}_2\text{O}_5$  electrodes at (a)  $0.1 \text{ A g}^{-1}$ , (b)  $1 \text{ A g}^{-1}$ .



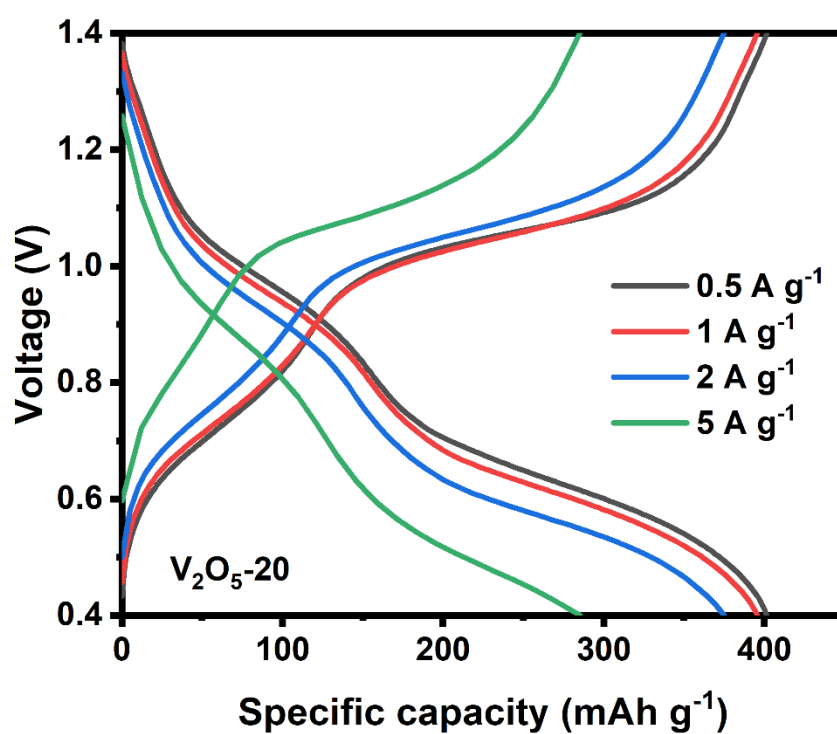

Figure S11. Specific capacity of  $V_2O_5-20$  cathode at various current densities.

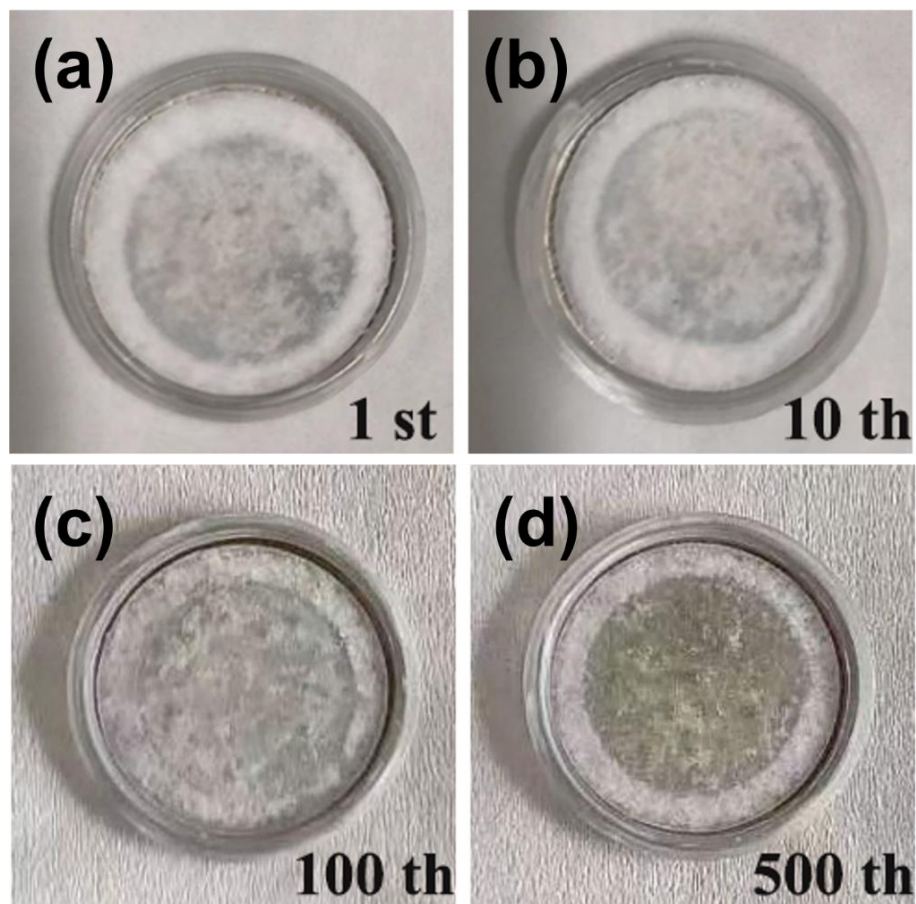

Figure S12. The pictures of battery separators after different recycle times: (a) 1st, (b) 10th, (c) 100th and (d) 500th.

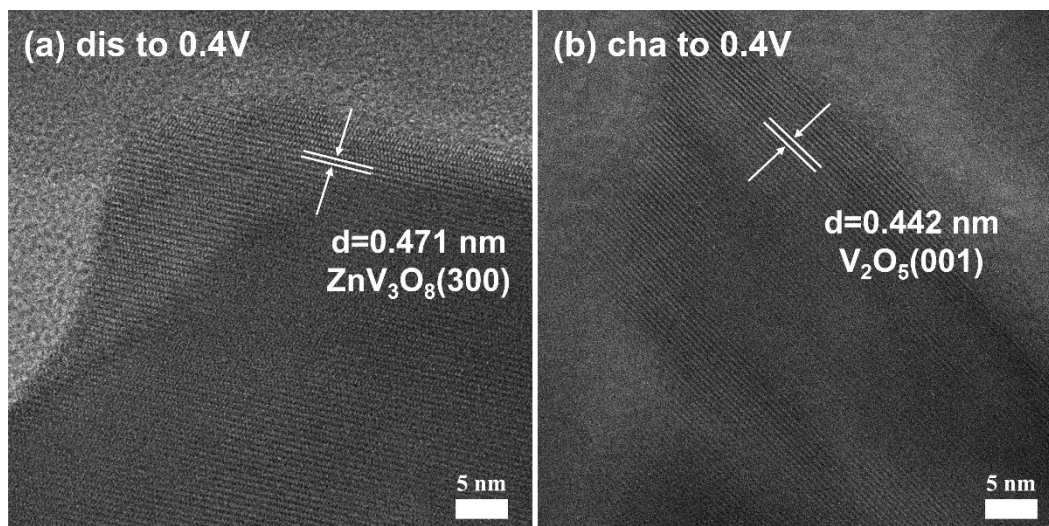

**Figure S13.** HRTEM images of V<sub>2</sub>O<sub>5</sub>-20 electrode (a) discharged to 0.4 V, (b) charged to 1.4 V.

**Table S1.** The BET surface area, pore volume and average pore size of V<sub>2</sub>O<sub>5</sub>-0 nanoparticles and V<sub>2</sub>O<sub>5</sub>-0 microspheres samples.

| Sample                            | BET surface area (m <sup>2</sup> g <sup>-1</sup> ) | Pore volume (cm <sup>3</sup> g <sup>-1</sup> ) | Average pore diameter(nm) |
|-----------------------------------|----------------------------------------------------|------------------------------------------------|---------------------------|
| V <sub>2</sub> O <sub>5</sub> -0  | 6.8468                                             | 0.03272                                        | 10.1882                   |
| V <sub>2</sub> O <sub>5</sub> -20 | 9.4024                                             | 0.04763                                        | 37.0358                   |

**Table S2.** A survey of V<sub>2</sub>O<sub>5</sub>-based electrode materials with three-dimensional structures for AZIBs.

| Cathode material<br>[Structure characteristic]               | Electrolyte                                              | Specific capacity     | Cycling performance   | Reference. |
|--------------------------------------------------------------|----------------------------------------------------------|-----------------------|-----------------------|------------|
| V <sub>2</sub> O <sub>5</sub><br>(porous microspheres)       | 3M Zn(CF <sub>3</sub> SO <sub>3</sub> ) <sub>2</sub>     | 401mAh/g<br>(0.1 A/g) | 73% (1000)<br>(2A/g)  | [15]       |
| V <sub>2</sub> O <sub>5</sub><br>(hollow spheres)            | Saturated ZnSO <sub>4</sub>                              | 280mAh/g<br>(0.2 A/g) | 82% (6200)<br>(10A/g) | [22]       |
| V <sub>2</sub> O <sub>5</sub><br>(nanospheres)               | 3M ZnSO <sub>4</sub>                                     | 327mAh/g<br>(0.1 A/g) | 69% (6000)<br>(10A/g) | [41]       |
| V <sub>2</sub> O <sub>5</sub> @CNTs<br>(irregular spherical) | 1 M ZnSO <sub>4</sub> /1 Na <sub>2</sub> SO <sub>4</sub> | 293mAh/g<br>(0.3 A/g) | 72% (6000)<br>(5A/g)  | [42]       |
| VO <sub>2</sub><br>(hollow nanospheres)                      | 3M Zn(CF <sub>3</sub> SO <sub>3</sub> ) <sub>2</sub>     | 440mAh/g<br>(0.1 A/g) | 47% (860)<br>(1A/g)   | [43]       |
